# Supplementary material
Source: PubMed Central journal article supplement (PMC3755748)
Supplement: NIHMS499243-supplement-MMC1.pdf [file NIHMS499243-supplement-MMC1.pdf]

# Supplemental Figure 1A: conservation of Pax7 protein domains across species.

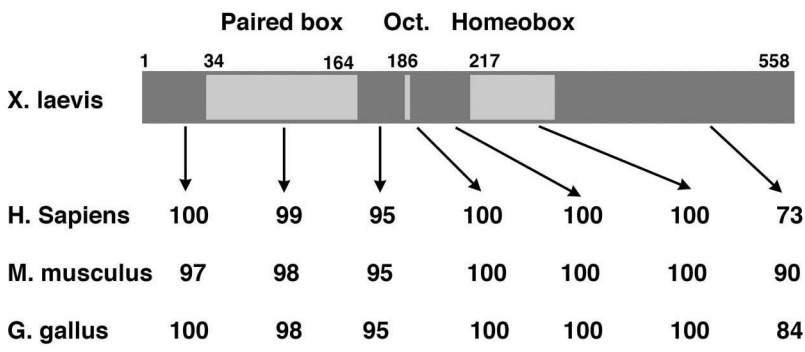

# Supplemental Figure 1B: Conservation of Pax7 proteins: sequence alignment

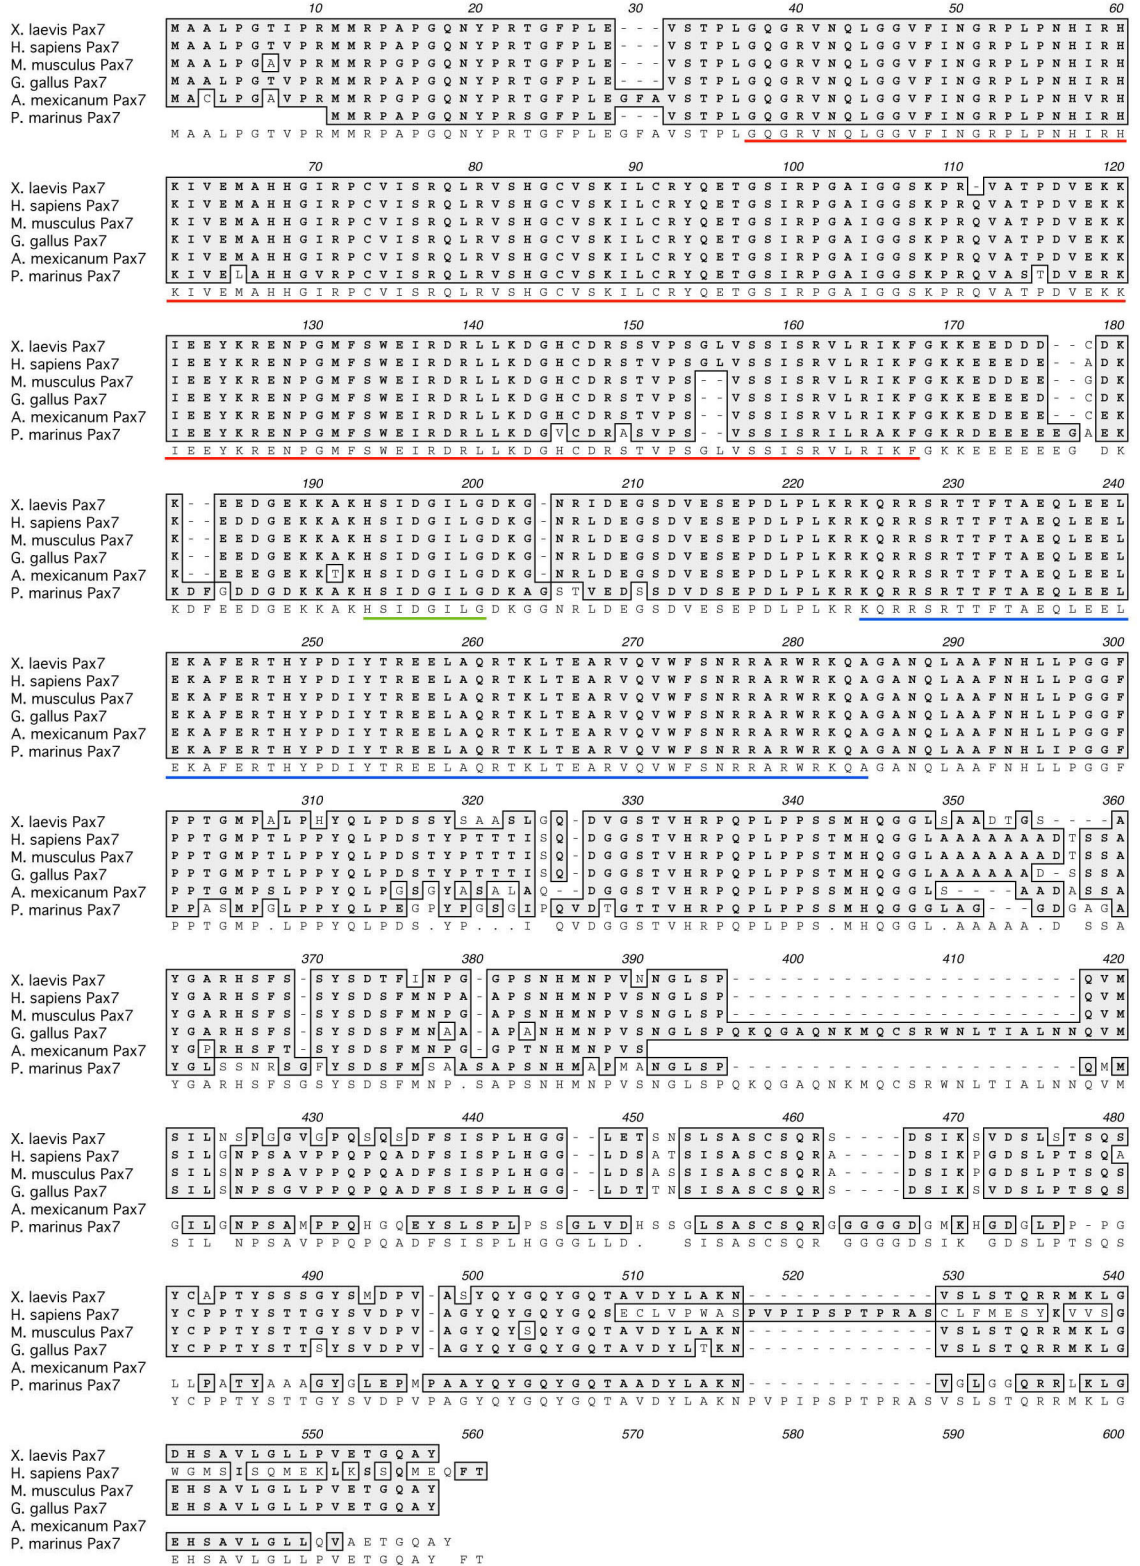

red: paired domain  
 blue: homeodomain  
 green: octapeptide
