# Supplementary material
Source: PubMed Central journal article supplement (PMC3755748)
Supplement: NIHMS499243-supplement-MMC2.pdf [file NIHMS499243-supplement-MMC2.pdf]

### Supplemental Figure 1C: X.I. Pax3 and X.I. Pax7 protein sequence alignment

|           |     |                                                                                   |     |
|-----------|-----|-----------------------------------------------------------------------------------|-----|
| x.l. Pax3 | 1   | M T S L A G A V P R M M R P C P G Q N Y P R T G F P L E V S T P L G Q G R V N Q   | 40  |
| x.l. Pax7 | 1   | M A A L P G T I P R M M R P A P G Q N Y P R T G F P L E V S T P L G Q G R V N Q   | 40  |
|           |     | M L G . P R M M R P P G Q N Y P R T G F P L E V S T P L G Q G R V N Q             |     |
| x.l. Pax3 | 41  | L G G V F I N G R P L P N H I R H K I V E M A H H G V R P C V I S R Q L R V S H   | 80  |
| x.l. Pax7 | 41  | L G G V F I N G R P L P N H I R H K I V E M A H H G I R P C V I S R Q L R V S H   | 80  |
|           |     | L G G V F I N G R P L P N H I R H K I V E M A H H G . R P C V I S R Q L R V S H   |     |
| x.l. Pax3 | 81  | G C V S K I L C R Y Q E T G S I R P G A I G G S K P K Q V T T P E V E K K M E E E | 120 |
| x.l. Pax7 | 81  | G C V S K I L C R Y Q E T G S I R P G A I G G S K P R - V A T P D V E K K I E E E | 119 |
|           |     | G C V S K I L C R Y Q E T G S I R P G A I G G S K P . Q V T P . V E K K E E E     |     |
| x.l. Pax3 | 121 | F K R D N P G M F S W E I R D K L L K D G V C D R N T V P S L - - V S S I S R I L | 158 |
| x.l. Pax7 | 120 | Y K R E N P G M F S W E I R D R L L K D G H C D R S S V P S G L V S S I S R V L   | 159 |
|           |     | . K R . N P G M F S W E I R D . L L K D G C D R . V P S G L V S S I S R . L       |     |
| x.l. Pax3 | 159 | R S K F G K G D E E D M E L D R K E Q E E S E K R A K H S I D G I L R E R A P V   | 198 |
| x.l. Pax7 | 160 | R I K F G K - K E E D D D C D K K E - E D G E K K A K H S I D G I L G D K G N R   | 197 |
|           |     | R K F G K G E E D . D . K E Q E . E K . A K H S I D G I L . . .                   |     |
| x.l. Pax3 | 199 | S P E S E E G S D I D S E P D L P L K R K Q R R S R T T F T A E Q L E E L E R A   | 238 |
| x.l. Pax7 | 198 | - - I D E G S D I V E S E P D L P L K R K Q R R S R T T F T A E Q L E E L E K A   | 234 |
|           |     | S P E . E G S D . . S E P D L P L K R K Q R R S R T T F T A E Q L E E L E . A     |     |
| x.l. Pax3 | 239 | F E R T H Y P D I Y T R E E L A Q R A K L T E A R V Q V W F S N R R A R R W R K Q | 278 |
| x.l. Pax7 | 235 | F E R T H Y P D I Y T R E E L A Q R T K L T E A R V Q V W F S N R R A R R W R K Q | 274 |
|           |     | F E R T H Y P D I Y T R E E L A Q R K L T E A R V Q V W F S N R R A R R W R K Q   |     |
| x.l. Pax3 | 279 | A G A N Q L M A F N H L L I P G A F P P A A M P A L P T Y Q L S E T S Y Q P T S I | 318 |
| x.l. Pax7 | 275 | A G A N Q L A A F N H L L I P G G F P P T G M P A L P H Y Q L P D S S Y S A A S L | 314 |
|           |     | A G A N Q L A F N H L . P G . F P P . M P A L P Y Q L . . S Y S .                 |     |
| x.l. Pax3 | 319 | P Q A V S D P S N T V H R P Q P L P P S S V H Q S S L P S N P E S S S A Y C L P   | 358 |
| x.l. Pax7 | 315 | G Q D V G - - S T V H R P Q P L P P S S M H Q G G L - S A A D T G S A Y G A -     | 349 |
|           |     | Q V D P S T V H R P Q P L P P S S H Q L P S . . S A Y . P                         |     |
| x.l. Pax3 | 359 | S G R H G F S S Y T D S F V P P S G P S N P M N P A I G N G L S P Q V M G L L T   | 398 |
| x.l. Pax7 | 350 | - - R H S F S S Y S D T F I N P S G G P S N H M N P V N - N G L S P Q V M S I L N | 386 |
|           |     | S G R H F S S Y . D . F . P G P S N M N P . G N G L S P Q V M . L                 |     |
| x.l. Pax3 | 399 | N H G G V P H Q P Q T D Y A L S P L T G G L E P S T A V S A S C S Q R L E H M K   | 438 |
| x.l. Pax7 | 387 | S P G G V G P Q S Q S D F S I S P L H G G L E T S N S L S A S C S Q R S D S I K   | 426 |
|           |     | G G V G P Q Q . D . S P L H G G L E T S N S . S A S C S Q R . K                   |     |
| x.l. Pax3 | 439 | S L D S L S T S Q S Y C - P T Y S T S G Y S M E P V T G Y Q Y P Q Y G Q S A F H   | 477 |
| x.l. Pax7 | 427 | S V D S L S T S Q S Y C A P T Y S S G Y S M D P V A S Y Q Y G Q Y G Q T A V D     | 466 |
|           |     | S . D S L S T S Q S Y C A P T Y S . S G Y S M . P V Y Q Y Q Y G Q . A             |     |
| x.l. Pax3 | 478 | Y L K P D I A                                                                     | 484 |
| x.l. Pax7 | 467 | Y L A K N V S L S T Q R R M K L G D H S A V L G L L P V E T G Q A Y               | 500 |
|           |     | Y L . L S T Q R R M K L G D H S A V L G L L P V E T G Q A Y                       |     |
