# Supplementary material
Source: PubMed Central journal article supplement (PMC3755748)

Sup Fig. 2A - *Xenopus tropicalis Pax7* genomic locus (Xt v4.1 Scaffold 930-65421-162920)

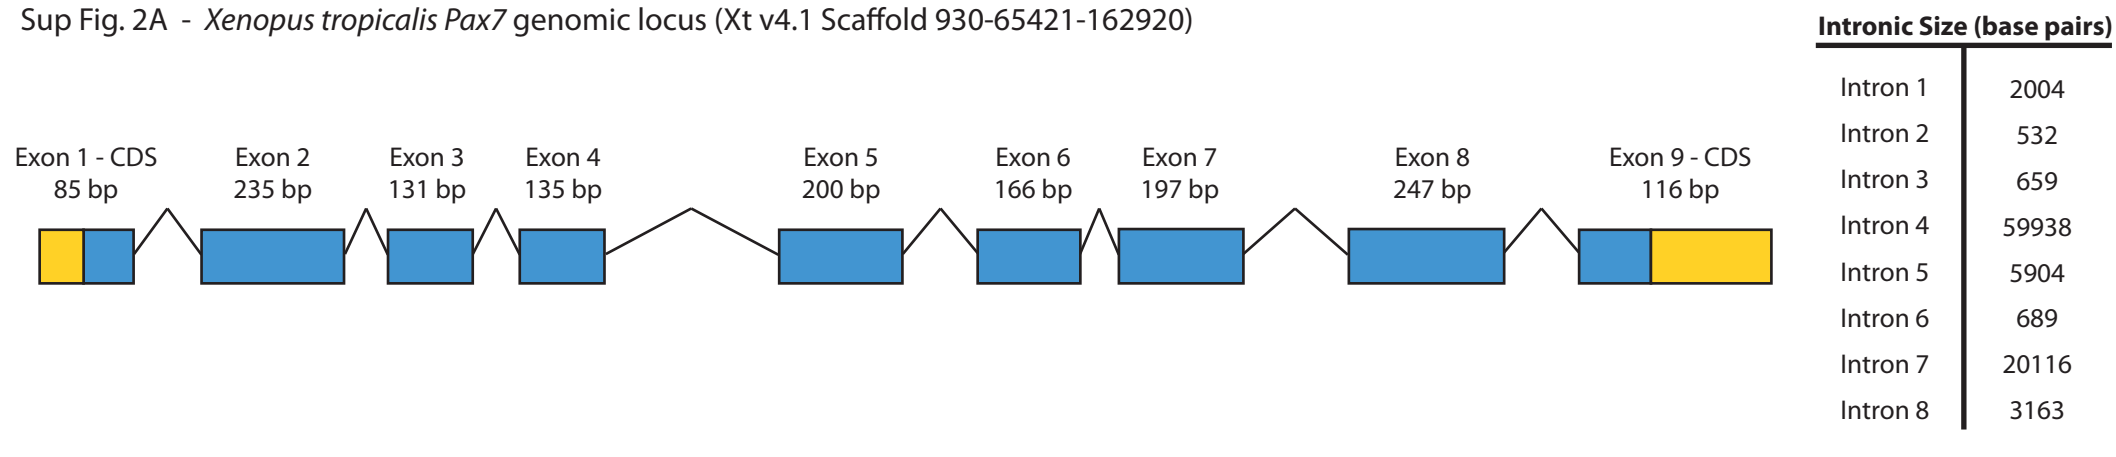

Sup Fig. 2B - *Xenopus laevis Pax7* mRNA (AY725267)

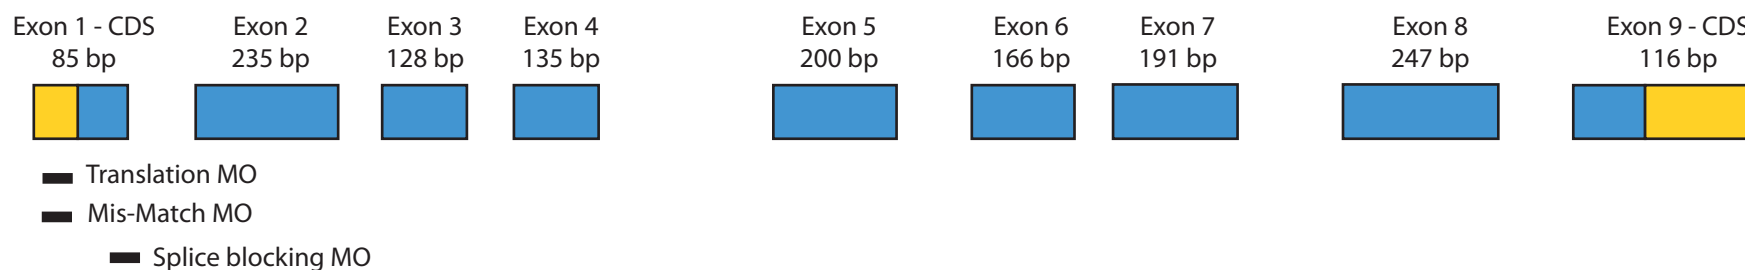

Sup Fig. 2C - Alignment of *xIPax3*, *xIPax7* and morpholinos

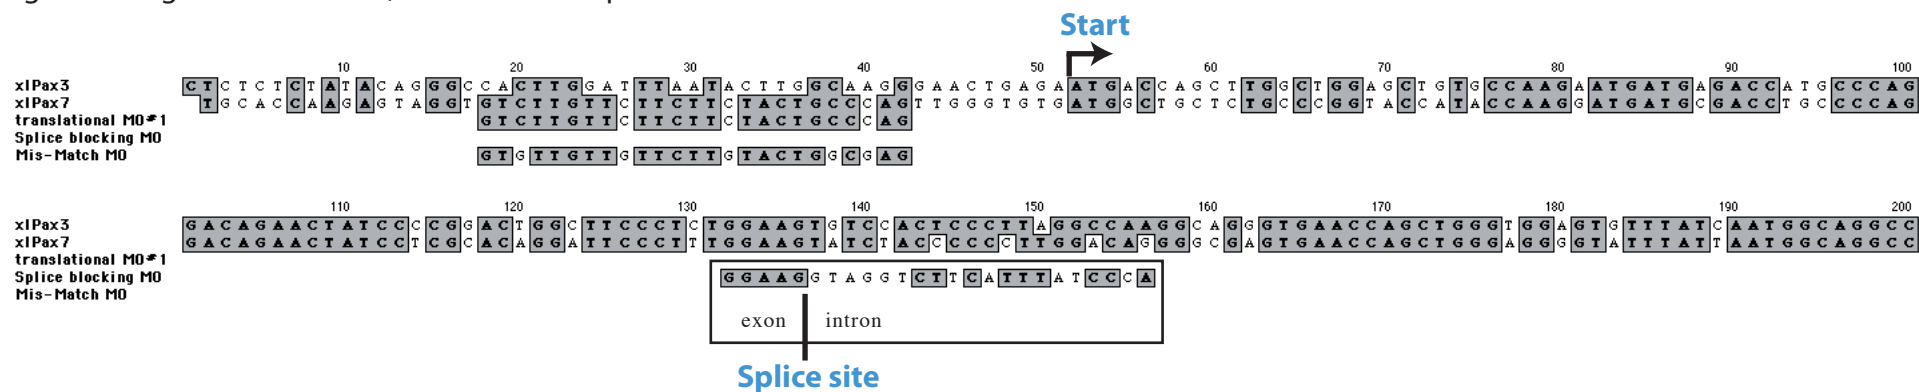

Supplement: NIHMS499243-supplement-MMC4.pdf [file NIHMS499243-supplement-MMC4.pdf]
