# Supplementary material
Source: PubMed Central journal article supplement (PMC3755748)
Supplement: NIHMS499243-supplement-MMC5.pdf [file NIHMS499243-supplement-MMC5.pdf]

Supplemental Figure 2D: PCR primers used in this study

| PCR Primer   | Sequence                                                                                            | Reference                   |
|--------------|-----------------------------------------------------------------------------------------------------|-----------------------------|
| pax3         | Fd: 5' - GCCATGTCCCCGAGAACCAAC - 3'<br>Rev: 5' - CAAACAAGCCATTACCCACCAAC - 3'                       | (Monsoro-Burq et al., 2005) |
| pax7         | Fd: 5' - GGCGGTTCTTCCCAGGAG - 3'<br>Rev: 5' - CCAGCACAAAATCCACAGCG - 3'                             | This study                  |
| Muscle actin | Fd: 5'- GCT GAC AGA ATG CAG AAG - 3'<br>Rev: 5'- TTG CTT GGA GGA GTG TGT - 3'                       | (Stutz et al., 1986)        |
| EF1 $\alpha$ | Fd: 5'- CAG ATT GGT GCT GGA TAT GC - 3'<br>Rev: 5'- AC TGC CTT GAT GAC TCC TAG - 3'                 | (Krieg et al., 1989)        |
| snail2       | Fd: 5'- TCCCGCACTGAAAATGCCACGATC - 3'<br>Rev: 5'- CCGTCCTAAAGATGAAGGGTATCCTG - 3'                   | (Mizuseki et al., 1998)     |
| myoD         | Fd: 5'- AGC TCC AAC TGC TCC GAC GGC ATG AA - 3'<br>Rev: 5'- AGG AGA GAA TCC AGT TGA TGG AAA CA - 3' | (Rupp and Weintraub, 1991)  |
| Vent1        | Fd: 5'- GCA TCT CCT TGG CAT ATT TGG - 3'<br>Rev: 5'- TTC CCT TCA GCA TGG TTC AAC - 3'               | (Shappira et al., 1999)     |

Supplemental Figure 2E: Morpholinos used in this study

| Morpholino name   | Sequence                        | Reference                   |
|-------------------|---------------------------------|-----------------------------|
| Fgf8MO            | 5'-GGAGGTGATGTAGTTCATGTTGCTC-3' | (Monsoro-Burq et al., 2003) |
| Pax3MO            | 5'-TCTCAGTTCCCTTGCCAAGTATTAA-3' | (Monsoro-Burq et al., 2005) |
| Pax7MO            | 5'-CTGGGCAGTAGAAGAAGAACAAGAC-3' | This study.                 |
| Pax7 spliceMO     | 5'-TGGGATAAATGAAGACCTACCTTCC-3' | This study                  |
| Pax7misMO         | 5'-CTCGCCAGTACAAGAACAACAACAC-3' | This study                  |
| $\beta$ CateninMO | 5'-TTTCAACCGTTTCCAAGAACCAGG-3'  | Gene Tools, inc.            |

Supplemental Figure 2F: Pax3MO and Pax7 MO alignment on target sequence : X.l.Pax3 (AY725269), X.l.Pax7 (AY725267).

```

Pax3MO          3'AATTATGAAC CGTTCCTTG ACTCT 5'
Pax3      105 CCGGCTCTCA CTCTCTCTCT CTATACAGGG CCACTTGGAT TTAATACTTG GCAAGGGAAC TGAGAATGAC CAGCTTGGCT GGAGCTGTGC CAAGAATGAT G-205
                - - - - - . . . - - - - - . . . - - - - - . . . - - - - -
Pax7      200 TTGGGTTTTG TTGAGTTGCA CCAAGAGTAG GTGTCTTGTT CTTCTTCTAC TGCCAGTTG GGTGTGATGG CTGCTCTGCC CGGTACCATA CCAAGGATGA T-300
Pax7MO          3'CAGAACAA GAAGAAGATG ACGGGTC 5'

```

- : mismatch  
. : conserved residue
