# Supplementary material
Source: PubMed Central journal article supplement (PMC3755748)

**Pax7-5mismatch-MO**  
**MyoD**                      **Snail2**

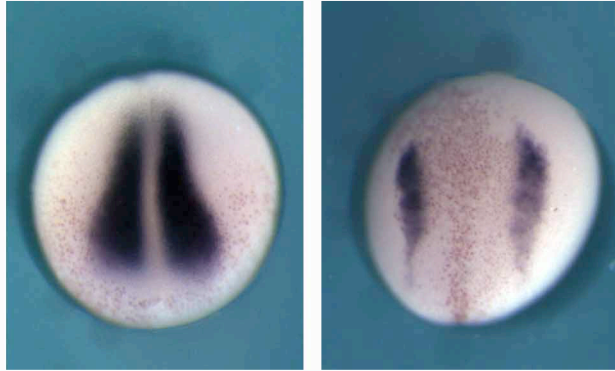

**MyoD**

injected side

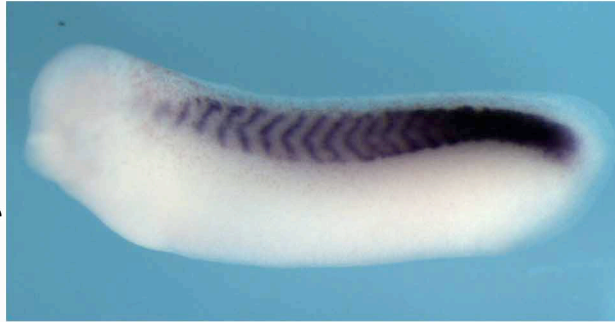

uninjected side

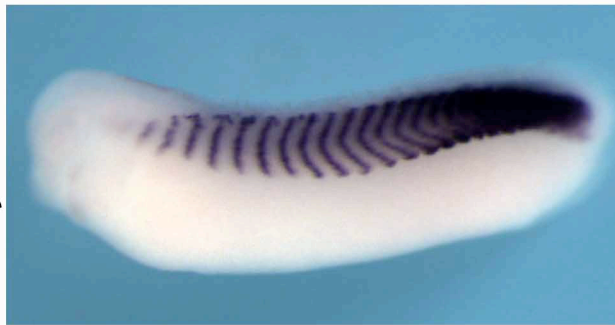

**Dct**

injected side

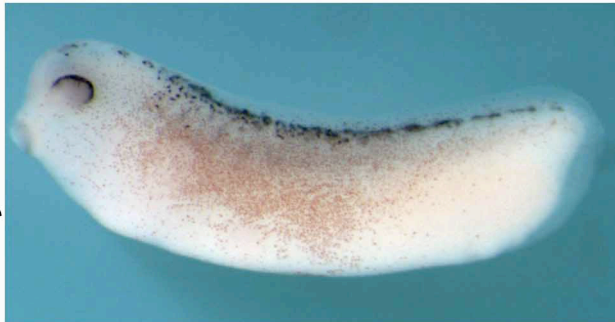

uninjected side

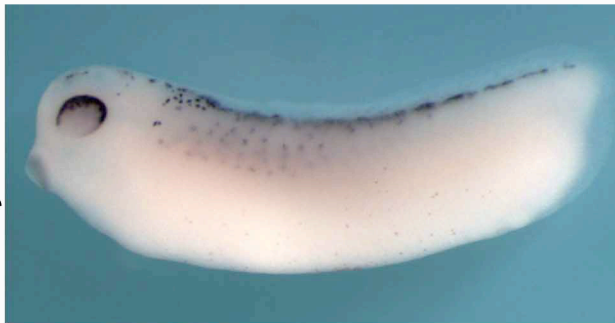

Supplement: NIHMS499243-supplement-MMC8.pdf [file NIHMS499243-supplement-MMC8.pdf]
