# Supplementary material
Source: PubMed Central journal article supplement (PMC3755748)

**Sox2**

**Hoxb9**

**Pax7**

**DMSO**

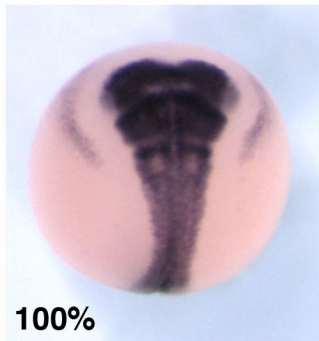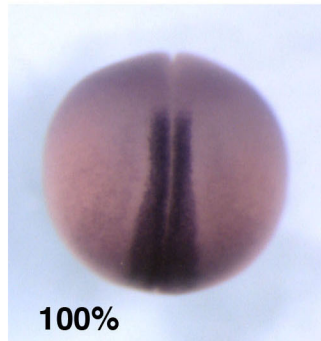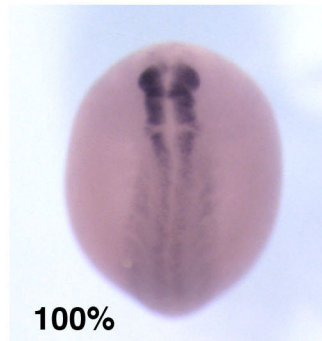

**SU5402 -st.12 to 18**

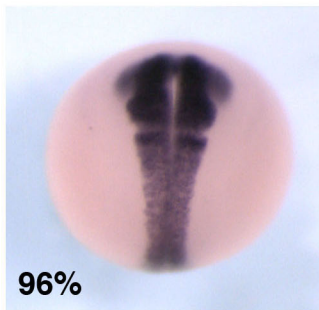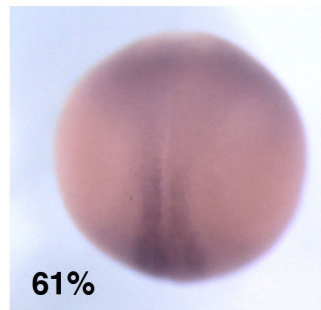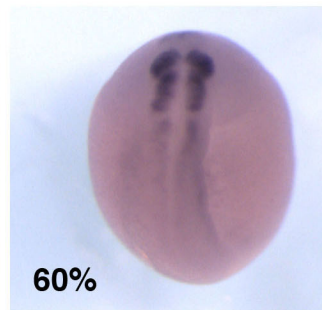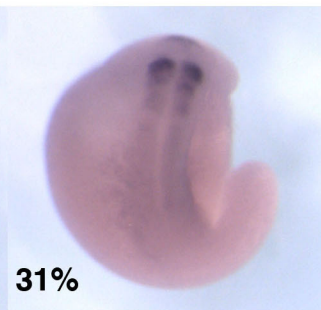

Supplement: NIHMS499243-supplement-MMC6.pdf [file NIHMS499243-supplement-MMC6.pdf]

**St 26 embryo (MyoD)**

**somite magnification**

**Control**

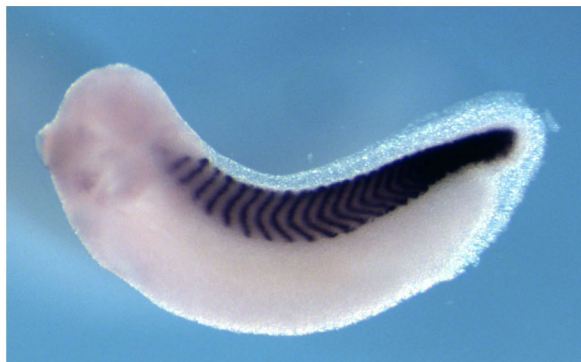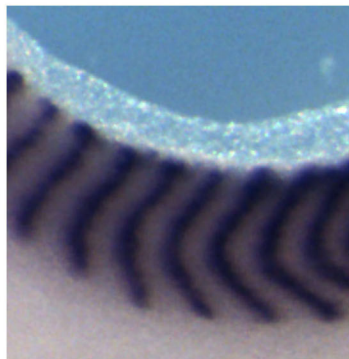

**Pax3MO-  
mild phenotype**

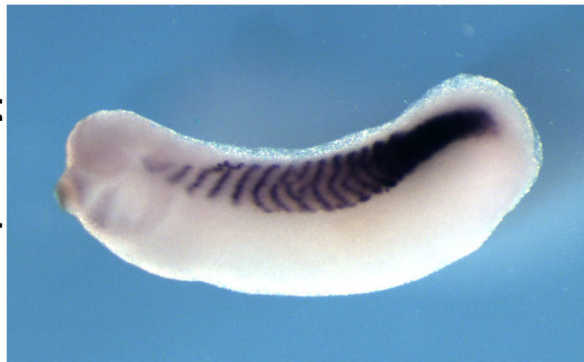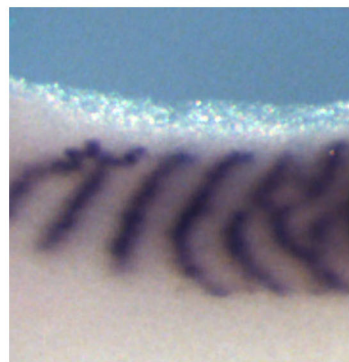

**Pax3MO  
severe phenotype**

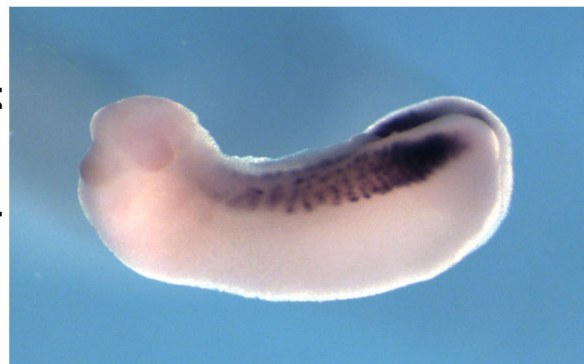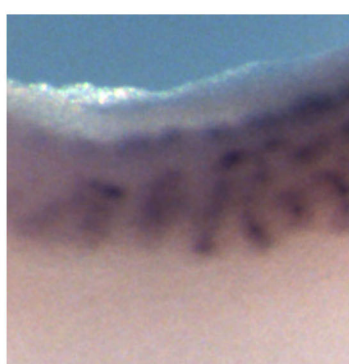

Supplement: NIHMS499243-supplement-MMC7.pdf [file NIHMS499243-supplement-MMC7.pdf]

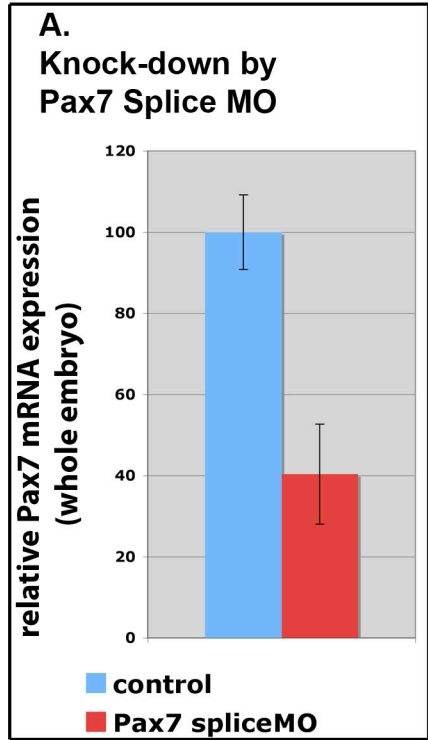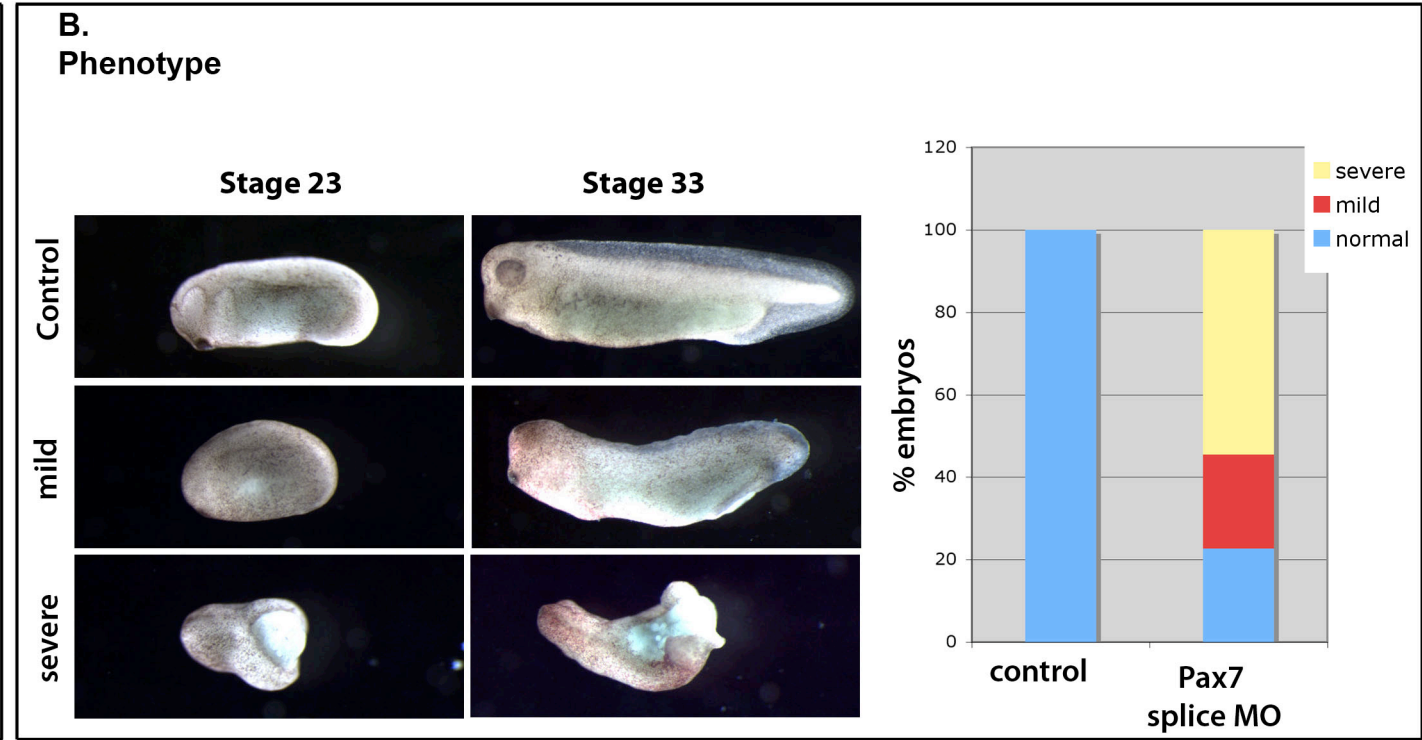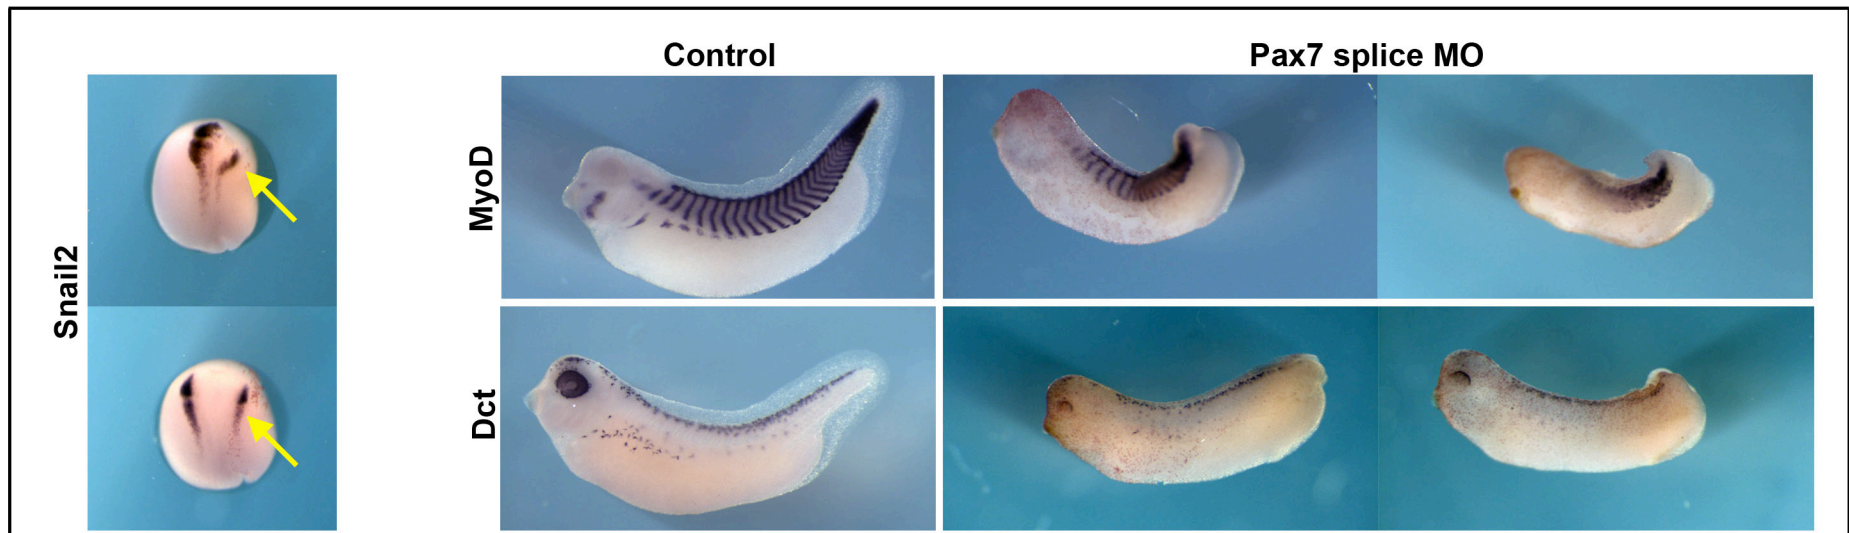

Supplement: NIHMS499243-supplement-MMC9.pdf [file NIHMS499243-supplement-MMC9.pdf]
